# Supplementary material for: Evaluation of Everolimus Pharmacokinetic Monitoring Based on Trough Concentration and Area Under the Blood Concentration Time Curve in Kidney Transplantation
Source: Research Square preprint supplement (doi:10.21203/rs.3.rs-7986395/v1), 2025-11-18
Supplement: Supplementary file 1 [file bfd160f8b6f4d7c408f8da0e.pdf]

**Evaluation of Everolimus Pharmacokinetic Monitoring Based on  
Trough Concentration and Area Under the Blood Concentration  
Time Curve in Kidney Transplantation**

Supplemental materials

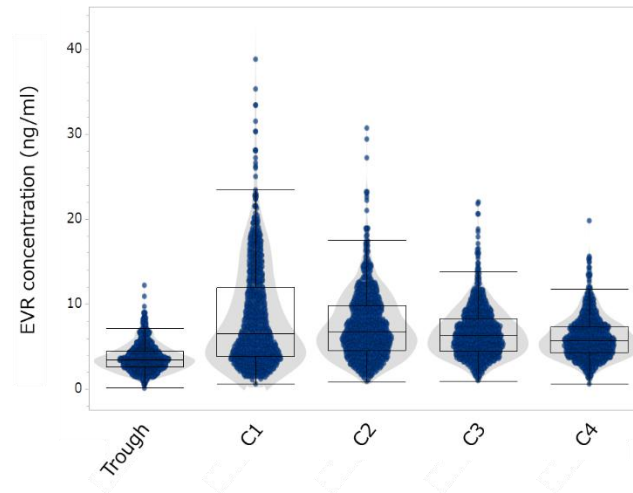

**Supplemental Figure S1: Distribution of everolimus (EVR) blood concentrations at each sampling time point (C0–C4)**

Violin plots showing the distribution of EVR concentrations at trough (C0) and 1, 2, 3, and 4 hours post-dose (C1–C4).

Horizontal bars indicate median values, and boxes represent interquartile ranges.

Whiskers denote the 10th–90th percentiles.

The figure illustrates that EVR concentrations peaked at C2, with a gradual decline thereafter. The median concentrations at each time point were as follows: C0: 3.5 ng/mL, C1: 6.5 ng/mL, C2: 6.7 ng/mL, C3: 6.3 ng/mL, and C4: 5.7 ng/mL.

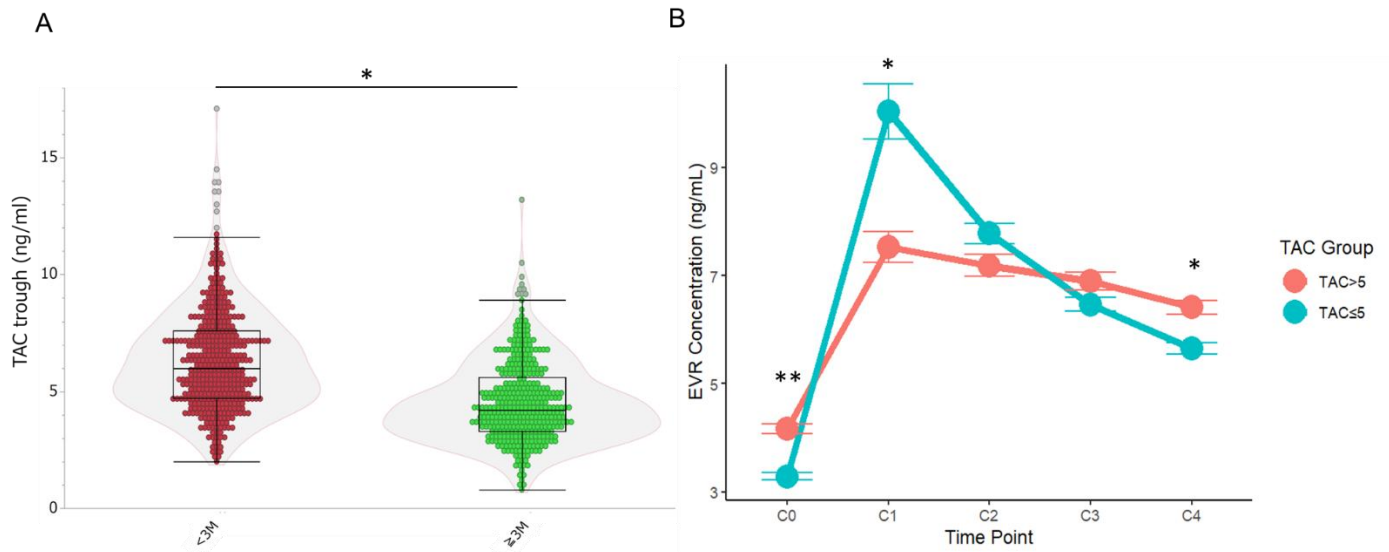

**Supplemental Figure S2:** Association between TAC trough levels and EVR concentrations.

(A) Violin plots comparing TAC trough levels between patients treated with EVR for <3 months (<3 M, red) and ≥3 months (≥3 M, green). Patients receiving EVR for ≥3 months exhibited significantly higher TAC trough concentrations than those treated for <3 months (median 5.8 vs. 4.2 ng/mL,  $p < 0.05$ ,  $t$ -test).

(B) Line plots showing time-course EVR concentrations stratified by TAC trough cutoff (TAC > 5 ng/mL, red; TAC ≤ 5 ng/mL, blue). Patients with higher TAC trough levels demonstrated significantly elevated EVR concentrations at 1 hour post-dose (C1) compared with those with lower TAC levels (mean 8.8 vs. 5.4 ng/mL,  $p < 0.05$ ,  $t$ -test).

Error bars represent standard error (SE). \*  $p < 0.05$ ; \*\*  $p < 0.01$ .

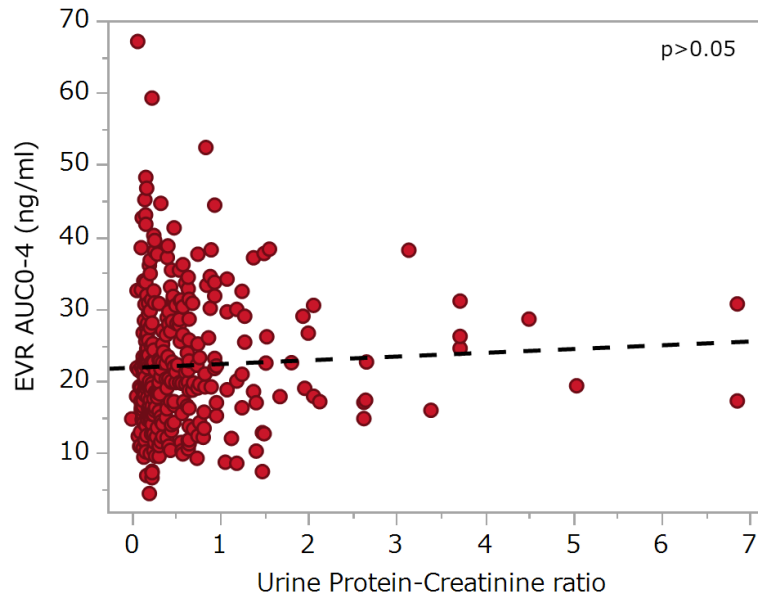

**Supplemental Figure S3:** Association between EVR AUC<sub>0-4</sub> and urinary protein receiving EVR for less than 3 months

Scatter plot illustrating the correlation between AUC<sub>0-4</sub> and the urine protein-to-creatinine ratio in patients receiving EVR for less than 3 months.  $r$ , Spearman's correlation coefficient with corresponding  $p$  value.

|                                              | De novo HL (+)<br>(109 tests) | De novo HL (-)<br>(421 tests) | p-value |
|----------------------------------------------|-------------------------------|-------------------------------|---------|
| <b>Duration of taking EVR</b> (Month)        | 14 (3 - 36)                   | 0 (0 – 5.8)                   | <0.05   |
| <b>Duration from transplantation</b> (Month) | 14 (3 - 36)                   | 0 (0 - 10)                    | <0.05   |
| <b>TAC trough</b> (ng/ml)                    | 4.3 (3.6 – 6.4)               | 5.2 (4.1 - 7)                 | <0.05   |

***Supplemental Table S1:*** Characteristics of de novo hyperlipemia

Data, median (IQR). IQR, interquartile range. The two groups were compared using t-test.
